# Supplementary material
Source: PubMed Central journal article supplement (PMC3641789)

# Supplemental Figure 1

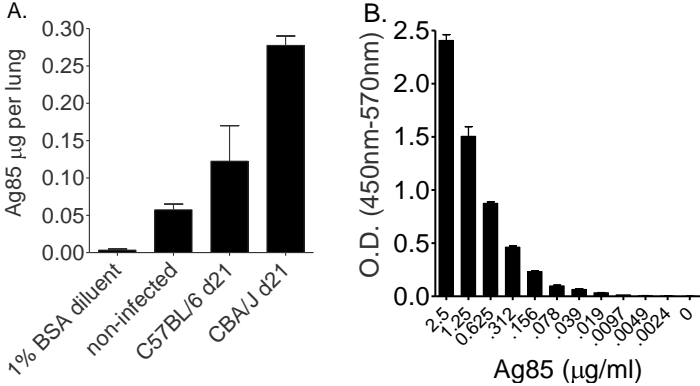

Supplement: NIHMS461049-supplement-Supplementary_Figure_1.pdf [file NIHMS461049-supplement-Supplementary_Figure_1.pdf]

# Supplemental Figure 2

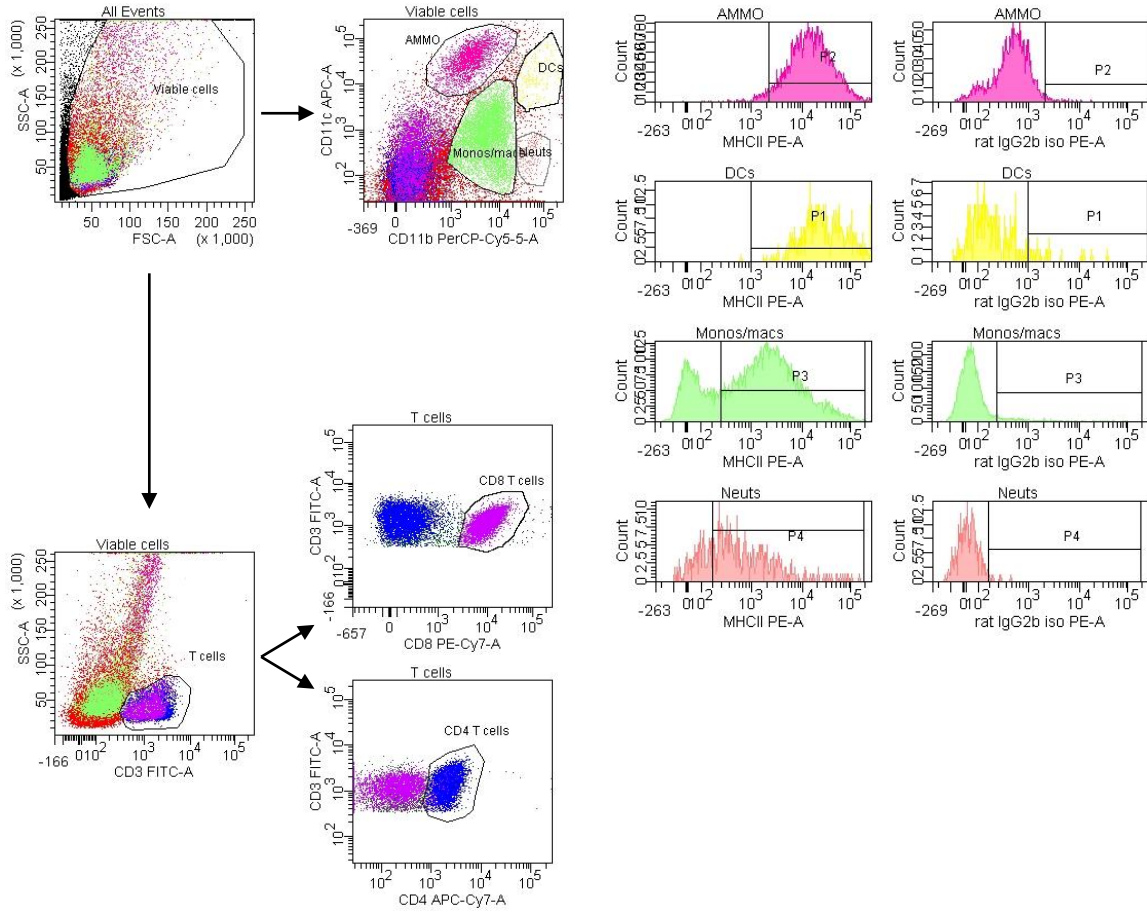

Supplement: NIHMS461049-supplement-Supplementary_Figure_2.pdf [file NIHMS461049-supplement-Supplementary_Figure_2.pdf]

# Supplemental Figure 3

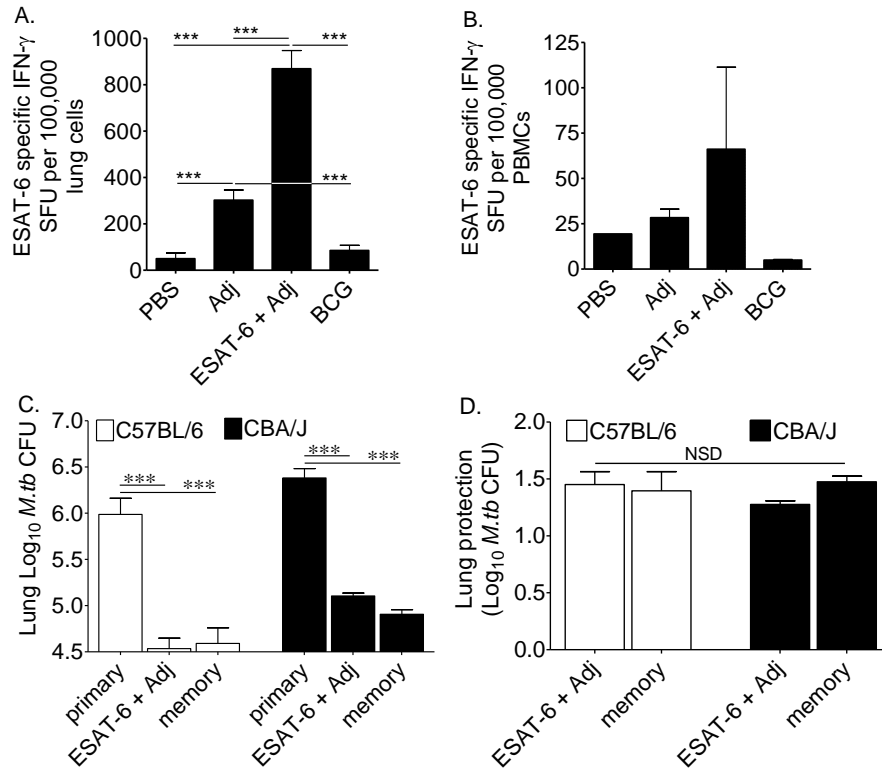

Supplement: NIHMS461049-supplement-Supplementary_Figure_3.pdf [file NIHMS461049-supplement-Supplementary_Figure_3.pdf]
